# Supplementary material
Source: PubMed Central journal article supplement (PMC1924562)
Supplement: pnas_0700687104_2.pdf [file pnas_0700687104_2.pdf]

# A *Sulfurovum* sp. NBC37-1

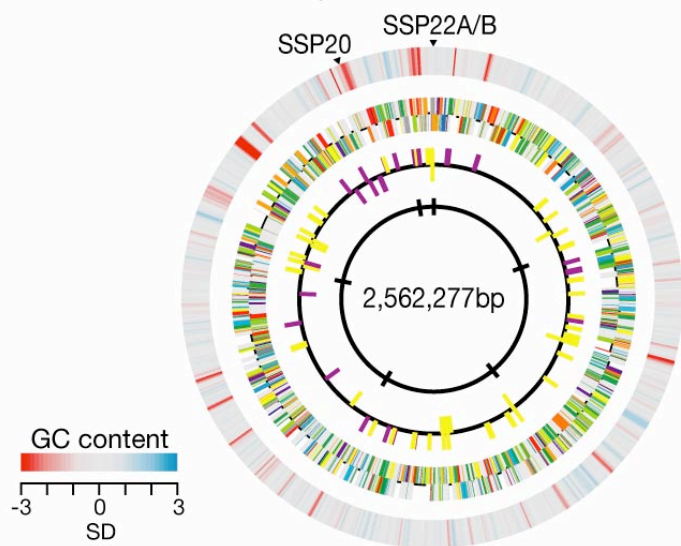

# B *Nitratiruptor* sp. SB155-2

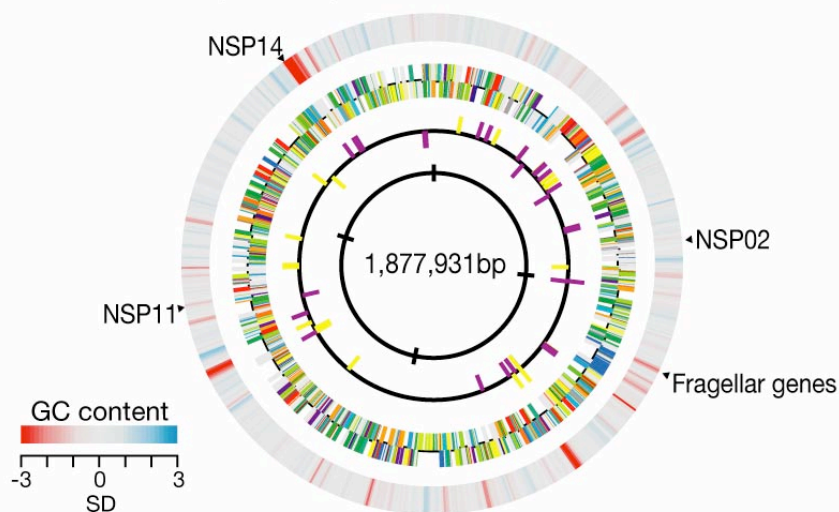

## COG Category

|                                                                                                    |                                                                               |
|----------------------------------------------------------------------------------------------------|-------------------------------------------------------------------------------|
| <span style="color: red;">■</span> Translation, ribosomal structure and biogenesis                 | <span style="color: yellow;">■</span> Carbohydrate transport and metabolism   |
| <span style="color: orange;">■</span> Transcription                                                | <span style="color: lightgreen;">■</span> Amino acid transport and metabolism |
| <span style="color: yellow;">■</span> Chromatin structure and dynamics                             | <span style="color: green;">■</span> Nucleotide transport and metabolism      |
| <span style="color: cyan;">■</span> Signal transduction mechanisms                                 | <span style="color: limegreen;">■</span> Coenzyme transport and metabolism    |
| <span style="color: blue;">■</span> Cell wall/membrane/envelope biogenesis                         | <span style="color: green;">■</span> Lipid transport and metabolism           |
| <span style="color: blue;">■</span> Cell motility                                                  | <span style="color: cyan;">■</span> Inorganic ion transport and metabolism    |
| <span style="color: purple;">■</span> Posttranslational modification, protein turnover, chaperones | <span style="color: gray;">■</span> General function prediction only          |
| <span style="color: yellow;">■</span> Energy production and conversion                             | <span style="color: gray;">■</span> Function unknown                          |
