# Supplementary material
Source: PubMed Central journal article supplement (PMC1924562)

Group 3,  $F_{420}$  reducing, bifunctional hyperthermophilic, MV-reducing, or bidirectional NAD-linked  $H_2$ ase

Group 1, membrane-bound  $H_2$ -uptake  $H_2$ ase

Group 2, cyanobacterial or  $H_2$ -sensing  $H_2$ ase

Group 4,  $H_2$ -evolving  $H_2$ ase

0.1

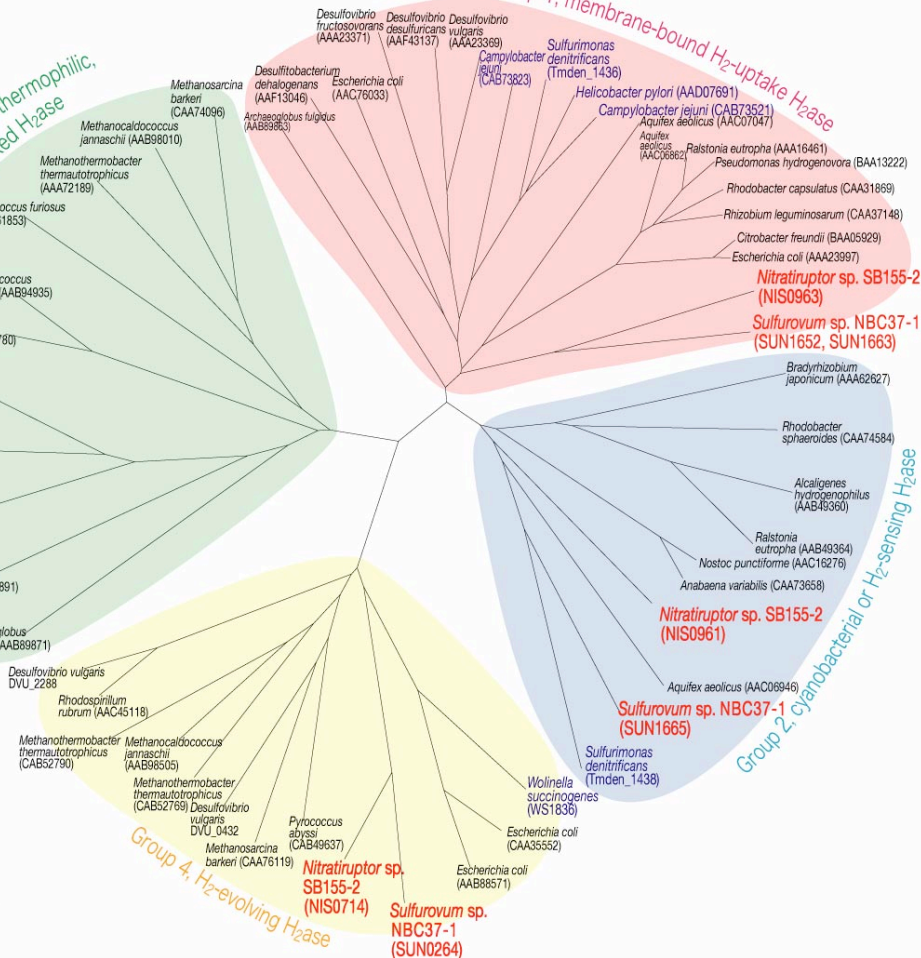

Supplement: pnas_0700687104_7.pdf [file pnas_0700687104_7.pdf]
