# Supplementary material
Source: PubMed Central journal article supplement (PMC1924562)
Supplement: pnas_0700687104_8.pdf [file pnas_0700687104_8.pdf]

**Table 2.** Genomic inventory of  $\epsilon$ -Proteobacteria

|                                                      | <i>Sulfurovum</i> sp.<br>NBC37-1                                                           | <i>Nitratiruptor</i> sp.<br>SB155-2                                             | <i>Helicobacter pylori</i><br>26695                | <i>Campylobacter jejuni</i><br>NCTC11168           | <i>Wolinella succinogenes</i><br>DSM1740                |
|------------------------------------------------------|--------------------------------------------------------------------------------------------|---------------------------------------------------------------------------------|----------------------------------------------------|----------------------------------------------------|---------------------------------------------------------|
| Hydrogenase type                                     | H <sub>2</sub> -uptake (2 copies),<br>H <sub>2</sub> -sensing,<br>H <sub>2</sub> -evolving | H <sub>2</sub> -uptake,<br>H <sub>2</sub> -sensing,<br>H <sub>2</sub> -evolving | H <sub>2</sub> -uptake                             | H <sub>2</sub> -uptake                             | H <sub>2</sub> -uptake,<br>H <sub>2</sub> -evolving     |
| Sulphur-compounds oxidation genes                    | <i>sorAB</i> (2 copies), <i>sqr</i><br>(2 copies), <i>soxXYZAB</i> ,<br><i>soxCDYZH</i>    | <i>sqr</i> (2 copies),<br><i>soxXYZAB</i> , <i>soxFLYZ</i>                      | -                                                  | -                                                  | -                                                       |
| Sensory systems                                      |                                                                                            |                                                                                 |                                                    |                                                    |                                                         |
| Chemotaxis proteins (Che)                            | -                                                                                          | 12 genes                                                                        | 6 genes                                            | 6 genes                                            | 10 genes                                                |
| Methyl-accepting chemotaxis<br>proteins (MCPs)       | -                                                                                          | 6 genes                                                                         | 3 genes                                            | 10 genes                                           | 31 genes                                                |
| Two-component signal<br>transduction system (TCSTs)* | 16 HKs, 18 RRs                                                                             | 26 HKs, 36 RRs                                                                  | 4 HKs, 6 RRs                                       | 7 HKs, 12 RRs                                      | 39 HKs, 52 RRs                                          |
| PAS-GGDEF system                                     | 23 genes                                                                                   | 36 genes                                                                        | -                                                  | 3 genes                                            | 24 genes                                                |
| Oxidative stress                                     |                                                                                            |                                                                                 |                                                    |                                                    |                                                         |
| Superoxide dismutase                                 | -                                                                                          | -                                                                               | +                                                  | +                                                  | +                                                       |
| Catalase                                             | +                                                                                          | -                                                                               | +                                                  | +                                                  | -                                                       |
| Cytochrome <i>c</i> peroxidase                       | + (4 copies)                                                                               | + (5 copies)                                                                    | +                                                  | + (2 copies)                                       | +                                                       |
| Thiol peroxidase                                     | +                                                                                          | +                                                                               | +                                                  | +                                                  | +                                                       |
| Alkyl hydroperoxide reductase                        | + (6 copies)                                                                               | + (5 copies)                                                                    | -                                                  | +                                                  | + (2 copies)                                            |
| Heavy metal transport                                | 22 genes (for Ni, Fe,<br>Zn, Mn, Co, Cd, Cu,<br>As, Mo, Hg, Ag)                            | 17 genes (for Ni, Fe,<br>Zn, Mn, Co, Cd, Cu,<br>As, Mo, Hg, Ag)                 | 8 genes (for Ni, Fe,<br>Zn, Co, Cd, Cu, Mo,<br>Hg) | 9 genes (for Fe, Zn,<br>Mn, Co, Cd, Mo, Hg,<br>As) | 15 genes (for Ni, Fe,<br>Zn, Mn, Co, Cd, Cu,<br>As, Mo) |
| Virulence factors                                    |                                                                                            |                                                                                 |                                                    |                                                    |                                                         |
| Vacuolating cytotoxins                               | -                                                                                          | -                                                                               | +                                                  | +                                                  | +                                                       |
| Cytolethal-distending toxin                          | -                                                                                          | -                                                                               | -                                                  | +                                                  | -                                                       |
| Neutrophil-activating protein                        | +                                                                                          | +                                                                               | +                                                  | +                                                  | +                                                       |
| Virulence factor MviN                                | +                                                                                          | +                                                                               | +                                                  | +                                                  | +                                                       |
| Hemolysin                                            | +                                                                                          | +                                                                               | +                                                  | +                                                  | +                                                       |
| Fibronectin- and Fibrinogen-<br>binding protein      | +                                                                                          | +                                                                               | +                                                  | +                                                  | +                                                       |
| Polysaccharide biosynthesis                          | +                                                                                          | +                                                                               | +                                                  | +                                                  | +                                                       |
| <i>N</i> -linked glycosylation pathway               | +                                                                                          | +                                                                               | -                                                  | +                                                  | +                                                       |
| Invasion antigen CiaB                                | +                                                                                          | +                                                                               | -                                                  | +                                                  | +                                                       |
| Lytic murein transglycosylase                        | +                                                                                          | +                                                                               | +                                                  | +                                                  | +                                                       |
| Urease gene cluster                                  | -                                                                                          | -                                                                               | +                                                  | -                                                  | -                                                       |

\*Gene numbers of histidine kinase (HK) and response regulator (RR) were shown.
