# Supplementary material
Source: PubMed Central journal article supplement (PMC1924562)
Supplement: pnas_0700687104_9.pdf [file pnas_0700687104_9.pdf]

**Table 3.** Flagellar genes in  $\epsilon$ -Proteobacteria genomes

|                                                       | <i>Sulfurovum</i><br>sp.<br>NBC37-1<br>genomic ID | <i>Nitratiruptor</i> sp.<br>SB155-2 genomic<br>ID | <i>Helicobacter</i><br><i>pylori</i> 26695<br>genomic ID | <i>Campylobacter</i><br><i>jejuni</i><br>NCTC11168<br>genomic ID | <i>Wolinella succinogenes</i><br>DSM1740 genomic ID |
|-------------------------------------------------------|---------------------------------------------------|---------------------------------------------------|----------------------------------------------------------|------------------------------------------------------------------|-----------------------------------------------------|
| Flagellar motor switch protein FliG                   | -                                                 | NIS0606                                           | HP0352                                                   | Cj0319                                                           | WS1998                                              |
| Flagellar motor switch protein FliM                   | -                                                 | NIS0607                                           | HP1031                                                   | Cj0060c                                                          | WS1638                                              |
| Flagellar motor switch protein FliN                   | -                                                 | NIS0608                                           | HP0584                                                   | Cj0351                                                           | WS1058                                              |
| Flagellar basal-body rod protein FlgF                 | -                                                 | NIS0609                                           | -                                                        | -                                                                | -                                                   |
| Flagellar basal-body rod protein FlgG                 | -                                                 | NIS0610                                           | HP1092/HP1585                                            | Cj0697/Cj0698                                                    | WS0149/WS1801/WS1802                                |
| Flagellar basal body P-ring formation protein FlgA    | -                                                 | NIS0611                                           | HP1477                                                   | Cj0769c                                                          | WS0610                                              |
| Flagellar L-ring protein FlgH                         | -                                                 | NIS0612                                           | HP0325                                                   | Cj0687c                                                          | WS2105                                              |
| Flagellar P-ring protein FlgI                         | -                                                 | NIS0613                                           | HP0246                                                   | Cj1462                                                           | WS1592                                              |
| Flagellar biosynthesis protein FlhA                   | -                                                 | NIS0615                                           | HP1041                                                   | Cj0882c                                                          | WS1053                                              |
| Flagellar biosynthesis protein FlhF                   | SUN1041                                           | NIS0616                                           | HP1035                                                   | Cj0064c                                                          | WS1642                                              |
| Flagellar biosynthesis switch protein FlhG            | -                                                 | NIS0617                                           | -                                                        | -                                                                | -                                                   |
| RNA polymerase sigma 28 factor FliA                   | -                                                 | NIS0618                                           | HP1032                                                   | Cj0061c                                                          | WS1639                                              |
| Flagellar hook length control protein FliK            | -                                                 | NIS0619                                           | HP0906                                                   | Cj0041                                                           | WS1761                                              |
| Flagellar basal-body rod protein FlgB                 | -                                                 | NIS0621                                           | HP1559                                                   | Cj0528c                                                          | WS1667                                              |
| Flagellar basal-body rod protein FlgC                 | -                                                 | NIS0622                                           | HP1558                                                   | Cj0527c                                                          | WS1666                                              |
| Flagellar hook-basal body complex protein FliE        | -                                                 | NIS0623                                           | HP1557                                                   | Cj0526c                                                          | WS1664                                              |
| Flagellar M-ring protein FliF                         | -                                                 | NIS0624                                           | HP0351                                                   | Cj0318                                                           | WS1999                                              |
| Flagellar-specific ATP synthase FliI                  | -                                                 | NIS0626                                           | HP1420                                                   | Cj0195                                                           | WS2207                                              |
| Flagellar hook capping protein FlgD                   | -                                                 | NIS0627                                           | HP0907                                                   | Cj0042                                                           | WS1760                                              |
| Flagellar basal body and hook protein FlgE            | -                                                 | NIS0628                                           | HP0870/HP0908                                            | Cj0043/Cj1729c                                                   | WS1758/WS1759                                       |
| Flagellar basal body-associated protein FliL          | -                                                 | NIS0629                                           | HP0809                                                   | Cj1408                                                           | WS1970                                              |
| Flagellar motor switch protein FliY                   | -                                                 | NIS0630                                           | HP1030                                                   | Cj0059c                                                          | WS1637                                              |
| Flagellar biosynthesis protein FliZ                   | -                                                 | NIS0631                                           | -                                                        | -                                                                | -                                                   |
| Flagellar transport protein FliP                      | -                                                 | NIS0632                                           | HP0684/HP0685                                            | Cj0820c                                                          | WS2093                                              |
| Flagellar biosynthetic protein FliQ                   | -                                                 | NIS0633                                           | HP1419                                                   | Cj1675                                                           | WS1489                                              |
| Flagellar biosynthetic protein FliR                   | -                                                 | NIS0634                                           | HP0173                                                   | Cj1179c                                                          | WS0191                                              |
| Flagellar biosynthetic protein FlhB                   | -                                                 | NIS0635                                           | HP0770                                                   | Cj0335                                                           | WS2009                                              |
| Flagellin FlaA                                        | -                                                 | NIS0640                                           | HP0601                                                   | Cj1339c                                                          | WS1503                                              |
| Flagellar protein FlaG                                | -                                                 | NIS0641                                           | HP0327/HP0751                                            | Cj0547/Cj1313                                                    | WS2108                                              |
| Flagellar hook-associated protein 2 FliD              | -                                                 | NIS0642                                           | HP0752                                                   | Cj0548                                                           | WS0150                                              |
| Flagellar protein FliS                                | -                                                 | NIS0643                                           | HP0753                                                   | Cj0549                                                           | WS0151                                              |
| Flagellar hook-associated protein 3 FliC              | -                                                 | NIS0644                                           | -                                                        | -                                                                | -                                                   |
| Flagellar hook-associated protein FlgK                | -                                                 | NIS0645                                           | HP1119                                                   | Cj1466                                                           | WS0259                                              |
| Flagellar motor protein MotB                          | -                                                 | NIS0984                                           | HP0816                                                   | Cj0336c                                                          | WS2092                                              |
| Flagellar motor protein MotA                          | -                                                 | NIS0985                                           | HP0815                                                   | Cj0337c                                                          | WS2090                                              |
| Flagellar export protein FliH                         | -                                                 | -                                                 | HP0353                                                   | Cj0320                                                           | WS1997                                              |
| Flagellar hook-associated protein FlaD                | -                                                 | -                                                 | -                                                        | Cj0887c                                                          | -                                                   |
| Flagellar hook-associated protein FlgL                | -                                                 | -                                                 | HP0295                                                   | -                                                                | WS0498                                              |
| Flagellar sheath adhesin HpaA                         | -                                                 | -                                                 | HP0797                                                   | -                                                                | -                                                   |
| Flagellin FlaB                                        | -                                                 | -                                                 | HP0115                                                   | Cj1338c                                                          | WS2198                                              |
| Flagellin FlaC                                        | -                                                 | -                                                 | -                                                        | Cj0720c                                                          | WS1075                                              |
| Flagellin FlaR                                        | -                                                 | -                                                 | -                                                        | Cj1312                                                           | -                                                   |
| Paralysed flagella protein PflA                       | -                                                 | -                                                 | HP1274                                                   | Cj1565c                                                          | WS0490                                              |
| Posttranslational flagellin modification protein PtmA | -                                                 | -                                                 | -                                                        | Cj1332                                                           | -                                                   |
| Posttranslational flagellin modification protein PtmB | -                                                 | -                                                 | -                                                        | Cj1331                                                           | -                                                   |
| RNA polymerase sigma 54 factor RpoN                   | -                                                 | -                                                 | HP0714                                                   | Cj0670                                                           | WS2100                                              |
| Secreted protein involved in flagellar motility       | -                                                 | -                                                 | HP1192                                                   | -                                                                | -                                                   |
| Secreted protein involved in flagellar motility       | -                                                 | -                                                 | HP1462                                                   | -                                                                | -                                                   |
