# Supplementary material
Source: PubMed Central journal article supplement (PMC1924562)

Approx.  
30m

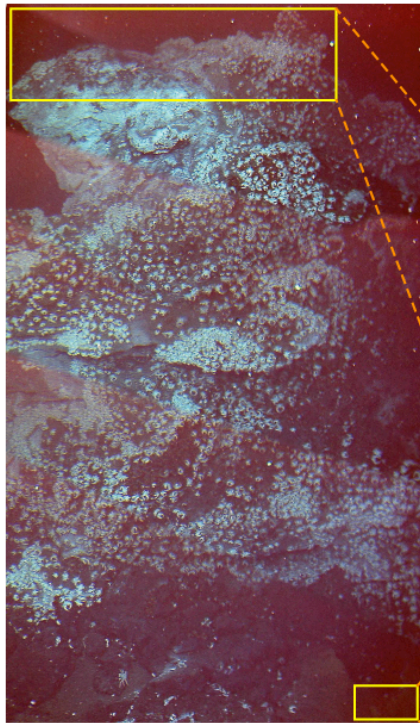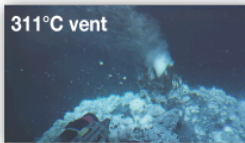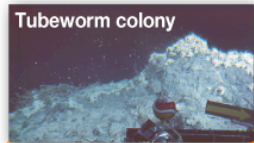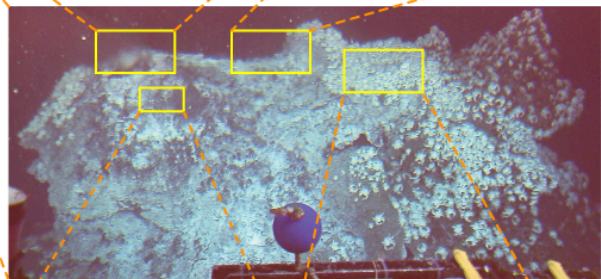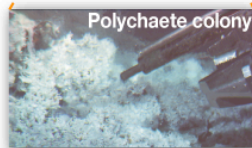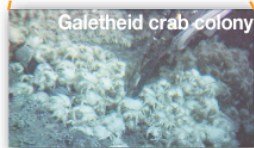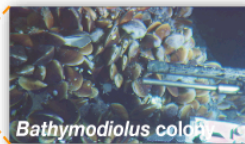

Supplement: pnas_0700687104_1.pdf [file pnas_0700687104_1.pdf]

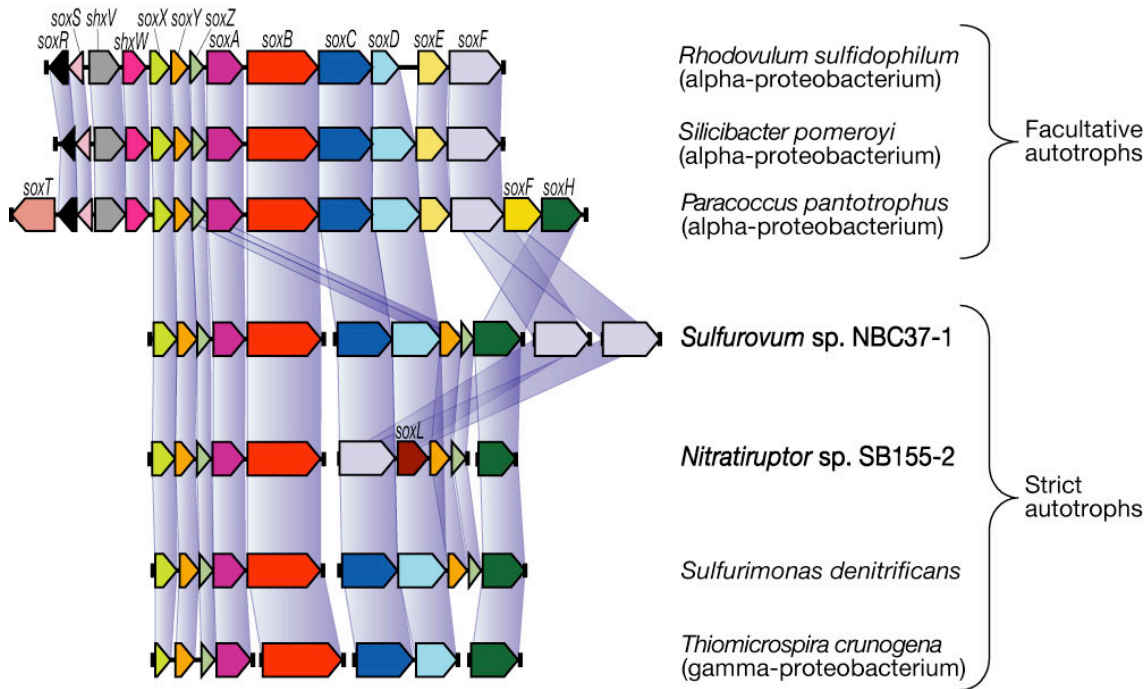

Supplement: pnas_0700687104_3.pdf [file pnas_0700687104_3.pdf]

A

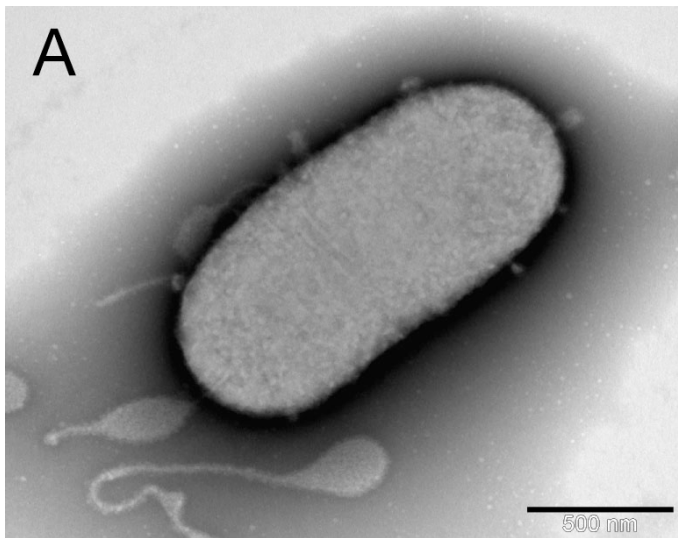

B

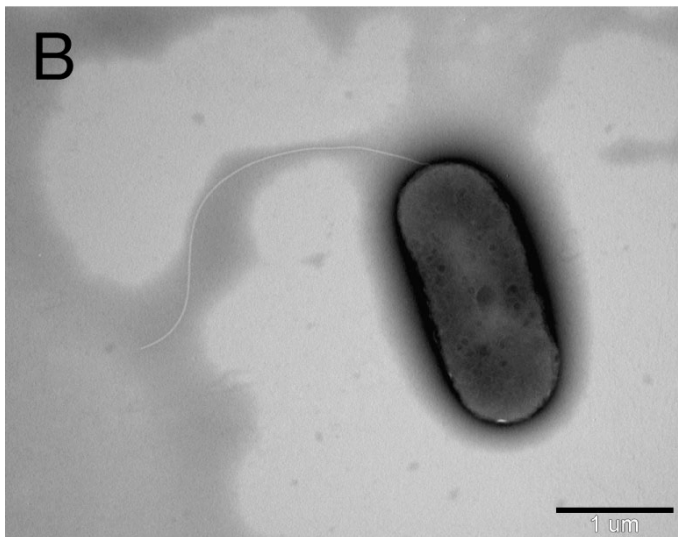

Supplement: pnas_0700687104_4.pdf [file pnas_0700687104_4.pdf]

**A**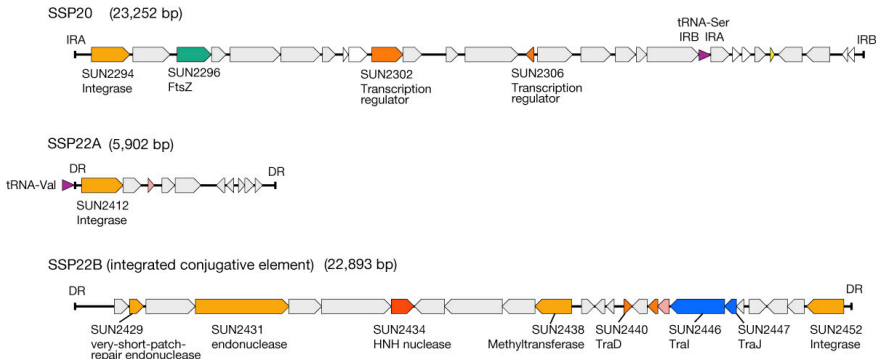**B**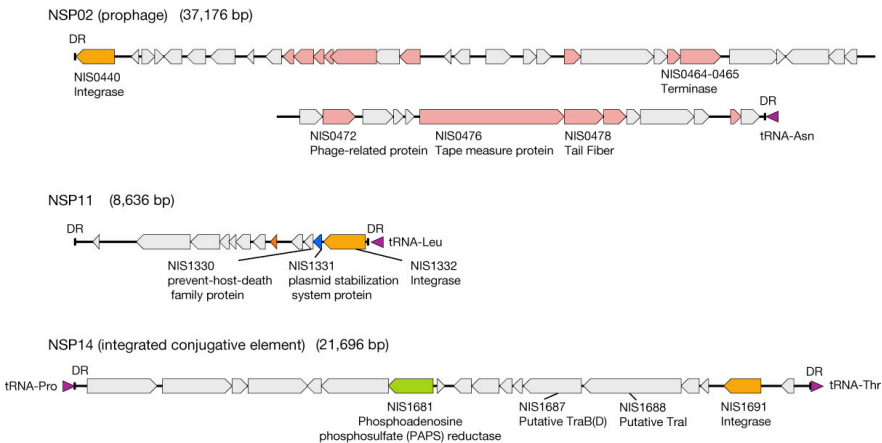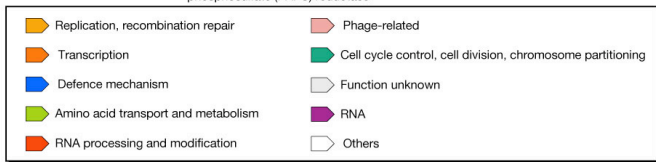

Supplement: pnas_0700687104_5.pdf [file pnas_0700687104_5.pdf]

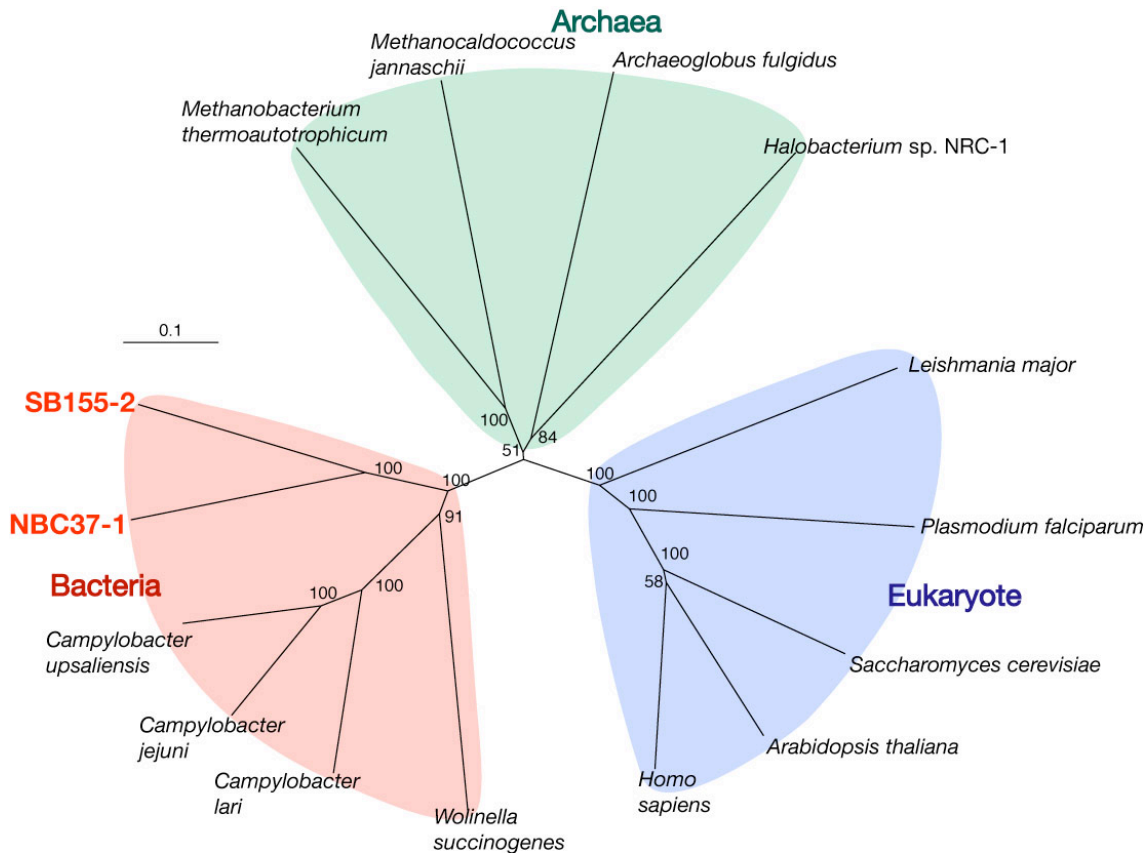

Supplement: pnas_0700687104_6.pdf [file pnas_0700687104_6.pdf]
